# Supplementary material for: A polyyne toxin produced by an antagonistic bacterium blinds and lyses a Chlamydomonad alga
Source: PubMed Central journal article supplement — Proc Natl Acad Sci U S A. 2021 Aug 13;118(33):e2107695118. doi: 10.1073/pnas.2107695118 (PMC8379975; doi:10.1073/pnas.2107695118), 2021-08-13
Supplement: pnas.2107695118.sapp.pdf [file pnas.2107695118.sapp.pdf]

1  
2  
3  
4  
5  
6  
7  
8  
9  
10  
11  
12  
13  
14  
15  
16  
17  
18  
19  
20  
21  
22  
23  
24

Supplementary Information for

**A polyne toxin produced by an antagonistic bacterium blinds and lyses a Chlamydomonas alga**

Vivien Hotter<sup>1</sup>, David Zopf<sup>2,3</sup>, Hak Joong Kim<sup>4</sup>, Anja Silge<sup>2,3</sup>, Michael Schmitt<sup>2</sup>, Prasad Aiyar<sup>1</sup>, Johanna Fleck<sup>2,3</sup>, Christian Matthäus<sup>3</sup>, Julian Hniopek<sup>2,3</sup>, Qing Yan<sup>7</sup>, Joyce Loper<sup>8</sup>, Severin Sasso<sup>1,6</sup>, Christian Hertweck<sup>4,5\*</sup>, Jürgen Popp<sup>2,3\*</sup>, Maria Mittag<sup>1\*</sup>

<sup>1</sup>Matthias Schleiden Institute of Genetics, Bioinformatics and Molecular Botany, Friedrich Schiller University Jena, 07743 Jena, Germany

<sup>2</sup> Institute of Physical Chemistry & Abbe Center of Photonics, Friedrich Schiller University Jena, 07743 Jena, Germany

<sup>3</sup> Department of Spectroscopy & Imaging, Leibniz Institute of Photonic Technology, Member of the Leibniz Research Alliance - Leibniz Health Technologies, 07745 Jena, Germany

<sup>4</sup>Leibniz Institute for Natural Product Research and Infection Biology (HKI) Beutenbergstr. 11a, 07745 Jena, Germany

<sup>5</sup>Faculty of Biological Sciences, Friedrich Schiller University Jena, 07743 Jena, Germany

<sup>6</sup>Institute of Biology, Plant Physiology, Leipzig University, 04103 Leipzig, Germany

<sup>7</sup>Department of Plant Sciences and Plant Pathology, Montana State University, Bozeman, MT USA

<sup>8</sup>Department of Botany and Plant Pathology, Oregon State University, Corvallis, OR, USA

25 \*Corresponding authors:

26 Christian Hertweck, **Email:** [christian.hertweck@leibniz-hki.de](mailto:christian.hertweck@leibniz-hki.de)

27 Jürgen Popp, **Email:** [juergen.popp@leibniz-ipht.de](mailto:juergen.popp@leibniz-ipht.de)

28 Maria Mittag, **Email:** [M.Mittag@uni-jena.de](mailto:M.Mittag@uni-jena.de)

29

30

31 **This PDF file includes:**

32       Supplementary Materials and Methods

33       Figures S1 to S16

34       Tables S1 to S3

35       SI Note

36       SI References

37

38

39

40

#### 41 **Creation of a desaturase mutant ( $\Delta pgnE$ )**

42 *P. protegens* Pf-5 (thereafter abbreviated as *P. protegens*) was cultivated on LB agar at 30 °C for  
43 2 days and inoculated into Luria-Bertani (LB) medium for further incubation for 1 day. The  
44 bacterial cells were collected by centrifugation (5,000 rpm, 5 min). Genomic DNA of *P. protegens*  
45 was acquired by using a MasterPure™ complete DNA purification kit (Lucigen, Madison). The  
46 *pgnE* gene in the putative protegencin biosynthetic gene cluster was PCR amplified from the  
47 genomic DNA of *P. protegens* with specific primers (Table S3) and ligated with the apramycin  
48 resistance gene. The combined gene fragment was inserted into pJET1.2/Blunt vector.  
49 *Escherichia coli* TOP10 competent cells were transformed with the corresponding vector using  
50 electroporation (2,500 V). The transformed cells were incubated on LB agar and medium with  
51 apramycin and ampicillin at 37 °C for 1 day. The vector containing the combined gene fragment  
52 was purified by using a Monarch® Plasmid Miniprep Kit (New England BioLabs, Frankfurt am  
53 Main). The transformation of *P. protegens* with the corresponding vector was conducted by  
54 electroporation at 2,500 V, and the transformed cells were incubated on LB agar containing  
55 apramycin and ampicillin at 30 °C. The colony containing the corresponding mutation was  
56 inoculated into LB medium with apramycin and ampicillin and further incubated at 30 °C until  
57 OD<sub>600</sub> value became 4–5. The bacterial cells were collected by centrifugation (5,000 rpm, 5 min)  
58 and washed with Tris-Acetate-Phosphate (TAP) medium twice. The collected cells were  
59 incubated in TAP medium with ampicillin and apramycin at 30 °C for 1 day for further analytic  
60 procedures.

61

#### 62 **General analytic procedures**

63 Analytic high-performance liquid chromatography (HPLC) measurements were performed on a  
64 Shimadzu Prominence HPLC system consisting of an autosampler, high-pressure pumps, column  
65 oven and PDA using a Macherey-Nagel C18 reverse phase column (Nucleosil 100, 5 µm, 125 ×  
66 4.6 mm, flow rate 1 mL min<sup>-1</sup>). HPLC grade acetonitrile and deionized water with 0.1%  
67 trifluoroacetic acid (TFA) were used as mobile phase for HPLC. The gradient elution for HPLC  
68 operation was from 0.5/99.5 of CH<sub>3</sub>CN/H<sub>2</sub>O with 0.1% (v/v) TFA to 100/0 for 5–35 min.  
69 Preparative HPLC measurement were performed on a Gilson Abimed equipped with Binary Pump  
70 321 and 156 UV/Vis detector (eluents: water with 0.1% (v/v) TFA and acetonitrile) using a  
71 Macherey-Nagel C18 reverse phase column (Nucleosil 100, 5 µm, 250 × 10 mm, flow rate 5 mL  
72 min<sup>-1</sup>). Liquid chromatography-mass spectrometry (LC-MS) measurements were performed using  
73 a QExactive Orbitrap High Performance Benchtop LC-MS with an electrospray ion source and an  
74 Accela HPLC system (Thermo Fisher Scientific, Bremen, Germany). For MS/MS measurements,  
75 an Exactive Orbitrap mass spectrometer with an electrospray ion source (Thermo Fisher

76 Scientific, Bremen, Germany) was used. NMR spectra were recorded on Bruker AVANCE III 500  
77 and 600 MHz (equipped with a Bruker Cryo platform) instruments.

78

#### 79 **Protegenic isolation and CuAAC reaction**

80 *P. protegens* was cultivated on LB agar at 30 °C for 2 days and inoculated into TAP medium. The  
81 bacterial culture was incubated at 30 °C with orbital shaking (150 rpm) for 1 day. The bacterial  
82 culture was extracted with ethyl acetate three times. The combined organic layers were reduced  
83 under rotary evaporation. The crude extract was purified by putative HPLC and silica gel column  
84 (Hex/EtOAc = 1:1) to remove extra fatty acids. The CuAAC reaction procedure was followed as  
85 previously reported (1). NMR and MS data of the triazol compound from click reaction with  
86 protegenicin and benzyl azide are same as reported one (1).

87

#### 88 **Bright field microscopy of co-cultures**

89 To determine the percentage of algal cells with one and no eyespots or multiple eyespot particles  
90 in the different co-cultures, 1 ml cell suspension was taken under sterile conditions after 0, 16,  
91 and 24 h of inoculation, respectively, concentrated at 4,500×g for 5 min at room temperature, and  
92 resuspended in 500 µl TAP. Cells were not fixed. Prior to examination, cells were allowed to  
93 settle on the microscope slide for a few minutes at room temperature in the dark. Pictures of at  
94 least 100 individual cells per co-culture and time point were taken with an Axiophot (Carl Zeiss,  
95 Germany). Each time, an axenic *C. reinhardtii* culture was examined the same way as a control.  
96 The percentage of cells with one and no eyespots based on the yellowish color of its carotenoids  
97 or multiple eyespot particles was analyzed visually. The experiments were conducted three times  
98 independently.

99

#### 100 **Evans blue assay**

101 For the Evans blue assay, the algal cell density was adjusted to  $2 \times 10^6$  cells mL<sup>-1</sup> in the alga's  
102 respective culture medium. Subsequently, cells were split in three technical replicates per  
103 treatment and each technical replicate treated with 2% (v/v) DMSO and 2% (v/v) protegenicin,  
104 respectively, for 24 h. In addition, these experiments were performed with treatments of 0.5%  
105 DMSO and 0.5% protegenicin, respectively. 10 µM mastoparan was used as a positive control for  
106 30 s, as well as ddH<sub>2</sub>O, the compound's solvent (2). For the duration of the treatment, the cells  
107 were kept shaking in the dark at room temperature. Subsequently, the cells were washed three  
108 times with their respective culture medium and finally resuspended in 0.1% (w/v) Evans blue in  
109 TAP. After incubation at room temperature for 5 min, the percentage of stained cells was

110 determined by brightfield microscopy (Axiophot, Carl Zeiss, Germany). At least 500 cells per  
111 technical replicate were examined.

112

### 113 **Survival assay**

114 To obtain the amount of colony forming units (CFUs) of *C. reinhardtii* and of the *eye3-2* mutant  
115 CC-4316 in the presence of protegencin as a means of algal survival rate, the algal cell density  
116 was adjusted to  $2 \times 10^6$  cells mL<sup>-1</sup> in the respective culture medium. Subsequently, cells were  
117 treated with 0.5% (v/v) DMSO and 0.5% (v/v) protegencin, respectively, for either 1 h or 4 h. An  
118 untreated control was handled identically. For the duration of the treatment, the cells were kept  
119 shaking in the dark at room temperature. Each treatment was serially diluted in the respective  
120 culture medium to a final dilution of 1:10,000. 100 µl of each dilution were plated on culture  
121 medium agar plates in triplicates and incubated at 23 °C under a 12:12 LD regime white light of  
122 an intensity of 50 µmol · m<sup>-2</sup> · s<sup>-1</sup> for 7 days. The percentage of surviving algae was calculated  
123 based on the CFUs visible after 7 days.

124 In case of *G. pectorale*, no CFUs were determined as the alga needs very long time periods  
125 (more than 4 weeks) to form single visible colonies on agar plates. Instead, the alga was treated  
126 as described above, but rather than serially diluted and plated, 100 µl of each technical replicate  
127 and treatment (0.5% (v/v) DMSO as control and 0.5% (v/v) protegencin) were added to 5 ml fresh  
128 liquid culture medium after the 4 h incubation. The untreated control was handled identically. After  
129 5 days of growth under a 12:12 LD regime with white light of an intensity of 50 µmol · m<sup>-2</sup> · s<sup>-1</sup> and  
130 shaking (200 rpm), the percentage of surviving algae was calculated based on the cell count in  
131 the cultures.

132

### 133 **Marker band regions**

134 Raman intensity maps were calculated by summing over compound specific marker bands. We  
135 distinguished four components in the analysis namely starch, typical cell compounds, carotenoid  
136 and protegencin. Particularly for starch, the analysis included only sharp prominent bands not  
137 overlaid by other Raman band features. The three marker bands for typical cell compounds were  
138 associated with lipids and proteins with rather broad Raman bands centered at 1451 cm<sup>-1</sup>,  
139 1660 cm<sup>-1</sup> and 2920 cm<sup>-1</sup>. The used Raman bands and their corresponding integration regions  
140 are listed in Table S1.

141

### 142 **Segmentation and background correction**

143 Before further analysis of the hyperspectral Raman images, segmentation of the latter in cell and  
144 background areas was performed. Furthermore, the previously performed background correction  
145 by the SNIP algorithm was supplemented by an additional correction taking the embedding (0.5%  
146 agarose) into account. For this purpose, the compound maps of starch, cell, and carotenoid  
147 marker bands were normalized on their corresponding maxima and summed up to an intensity  
148 map  $I_{\text{cell}}(x, y)$  which includes all cell components (Fig. S3A). Afterwards the mean value of the  
149 obtained intensity map was computed. The mean value served as threshold and pixel values in  
150  $I_{\text{cell}}(x, y)$  below or equal to the mean value were assigned as background pixels whereas pixels in  
151  $I_{\text{cell}}(x, y)$  with values greater than the mean were assigned cell pixels. Contiguous pixel areas  
152 smaller than 100 pixels in the resulting binary cell/background map were assigned to background  
153 pixels. The inset in Fig. S3B shows an exemplary binary image of the scanned area segmented in  
154 algae cell area (red) and background area (blue).

155 Using the background pixels found, a background correction of the Raman pixel spectra  
156 associated with the algal cells was performed to minimize the influence of the background signal  
157 originating from the 0.5% agarose embedding. For this, all Raman pixel spectra associated with  
158 the background were averaged (see blue spectrum in Fig. S3B). This background spectrum was  
159 then subtracted from all pixel spectra. Moreover, all single pixel spectra associated with  
160 background pixels were then substituted by the newly corrected average background  
161 spectrum. Latter was performed to avoid unnecessary fragmentation of the background area by  
162 the k-means-cluster-analysis.

163 The background corrected hyperspectral Raman image served further as the basis for the  
164 calculation of the presented Raman intensity maps and were employed for further analysis  
165 including k-means cluster analysis, carotenoid detection and the evaluation of the proteogencin  
166 content in single algae cells.

167

### 168 **K-means cluster analysis**

169 A k-means cluster analysis with  $k = 7$  was carried out after the above described background  
170 correction (3). The spatial cluster arrangement was visualized in false-color-plots after color-  
171 coding each cluster.

172

### 173 **Carotenoid detection**

174 To identify carotenoid clusters in single algae cells a fit of a Lorentzian profile  $L(\nu; \nu_0, A, \Gamma) = A \cdot$   
175  $\Gamma / [(\nu - \nu_0)^2 + \Gamma^2]$  was applied in each of the three marker band regions associated with  
176 carotenoid:  $1004 \pm 20 \text{ cm}^{-1}$ ,  $1157 \pm 20 \text{ cm}^{-1}$ , and  $1523 \pm 20 \text{ cm}^{-1}$ . Only pixel spectra where all  
177 three fits converged were considered for further analysis. We applied an additional constraint to

178 the resulting fit amplitudes  $A$ : the amplitudes of the Lorentzian profile should be greater than the  
179 average spectral intensity plus three times the intensity standard deviation in the wavenumber  
180 range  $10 \text{ cm}^{-1}$  above the corresponding carotenoid spectral region. For instance, the amplitude  
181  $A$  computed by a Lorentzian fit model in the wavenumber region of  $1004 \pm 20 \text{ cm}^{-1}$  must be greater  
182 than the average spectral intensity plus the three times intensity standard deviation ranging from  
183  $1025 \text{ cm}^{-1}$  to  $1035 \text{ cm}^{-1}$ . Latter constraint was applied to avoid that pixel with spectral noise are  
184 assigned falsely as carotenoid pixels. Pixel spectra fits which did not fulfill these requirements  
185 were discarded as possible carotenoid pixels. Contiguous pixel areas smaller than 4 pixels in the  
186 resulting binary map were discarded as well.

187

### 188 **Evaluation of the protegencin content**

189 The metric "Intensity(2160)/Intensity(1451)", defined as the ratio of the integrated spectral  
190 intensities of the peak features at  $2160 \text{ cm}^{-1}$  and  $1451 \text{ cm}^{-1}$  (see Table S1), served as a measure  
191 of the protegencin content. For this purpose, the integrated spectral intensities of the assigned  
192 algal cell pixels of the hyperspectral Raman image were averaged and the ratio of the latter was  
193 calculated for each investigated algal cell.

194

### 195 **Density Functional Theory calculations of protegencin and its Raman spectrum**

196 To confirm the detection of protegencin inside *via* Raman Spectroscopy, Density Functional  
197 Theory (DFT) calculations were performed on the *trans*-structure of protegencin. The calculations  
198 were performed using Orca (version 4.2) (4, 5). First, a relaxed geometry optimization was  
199 performed using the hybrid gradient corrected functional B3LYP (6, 7), and polarized triple- $\zeta$   
200 basis-set def2-TVZP combined with empirical dispersion correction using the Becke-Johnson  
201 damping scheme (8-10). To speed up the calculation resolution of identity approximation for the  
202 coulomb integrals with the auxiliary basis set def2/J was used (11, 12).

203 To confirm that the calculated spectrum represents a minimum in the 3N-6 dimensional potential  
204 energy hyperplane and to calculate the Raman spectrum, a subsequent numerical frequency and  
205 polarizability calculation was performed using the same functional and basis set, which allows for  
206 the calculation of Raman activities.

207 The calculated Raman activities were converted to Raman intensities by employing the following  
208 equation (13):

209

$$R_i = \frac{(2\pi)^4}{45} \cdot (\nu_0 - \nu_i)^4 \cdot \frac{h}{8\pi^2 c \nu_i \left[ 1 - e^{-\frac{h c \nu_i}{kT}} \right]} \cdot S_i(1)$$

210 Herein  $R_i, S_i, \nu_i, \nu_0, h, c, T, k$  represent the Raman intensity, Raman activity, vibrational frequency of  
211 the  $i$ th band, frequency of the incident laser light (in this experiment  $3.819 \cdot 10^{14}$  Hz or 785 nm),  
212 Planck's constant, the speed of light in vacuum, the temperature (in this case 298K / 25 °C), and  
213 Boltzmann's constant. To account for the missing description of anharmonicity and electron  
214 correlation in the calculated frequencies, an empirical correction factor of 0.965 was employed  
215 (14). To visualize the spectra the calculated line spectrum was broadened using a Lorentzian  
216 function with a full-width-at-half-maximum of  $18 \text{ cm}^{-1}$ .  
217



218

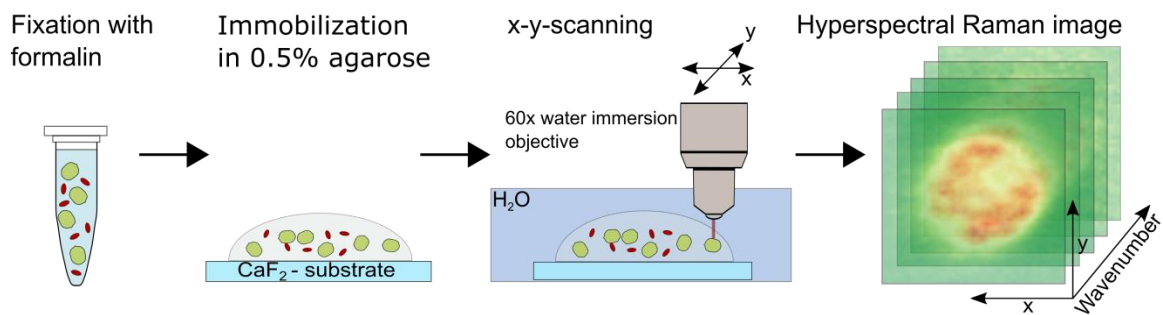

219

220

221 **Fig. S1.** Schematic of the sample preparation for Raman microspectroscopy and measurement  
222 principle. After the fixation of the algal cells in 4% v/v formalin, the algal cells were immobilized in  
223 0.5% agarose in TAP medium and transferred on a CaF<sub>2</sub>-platelet. Raman measurements were  
224 conducted in aqueous environment and a hyperspectral Raman image was generated by point-  
225 wise integration of a 15 μm × 15 μm large scanning grid.

226

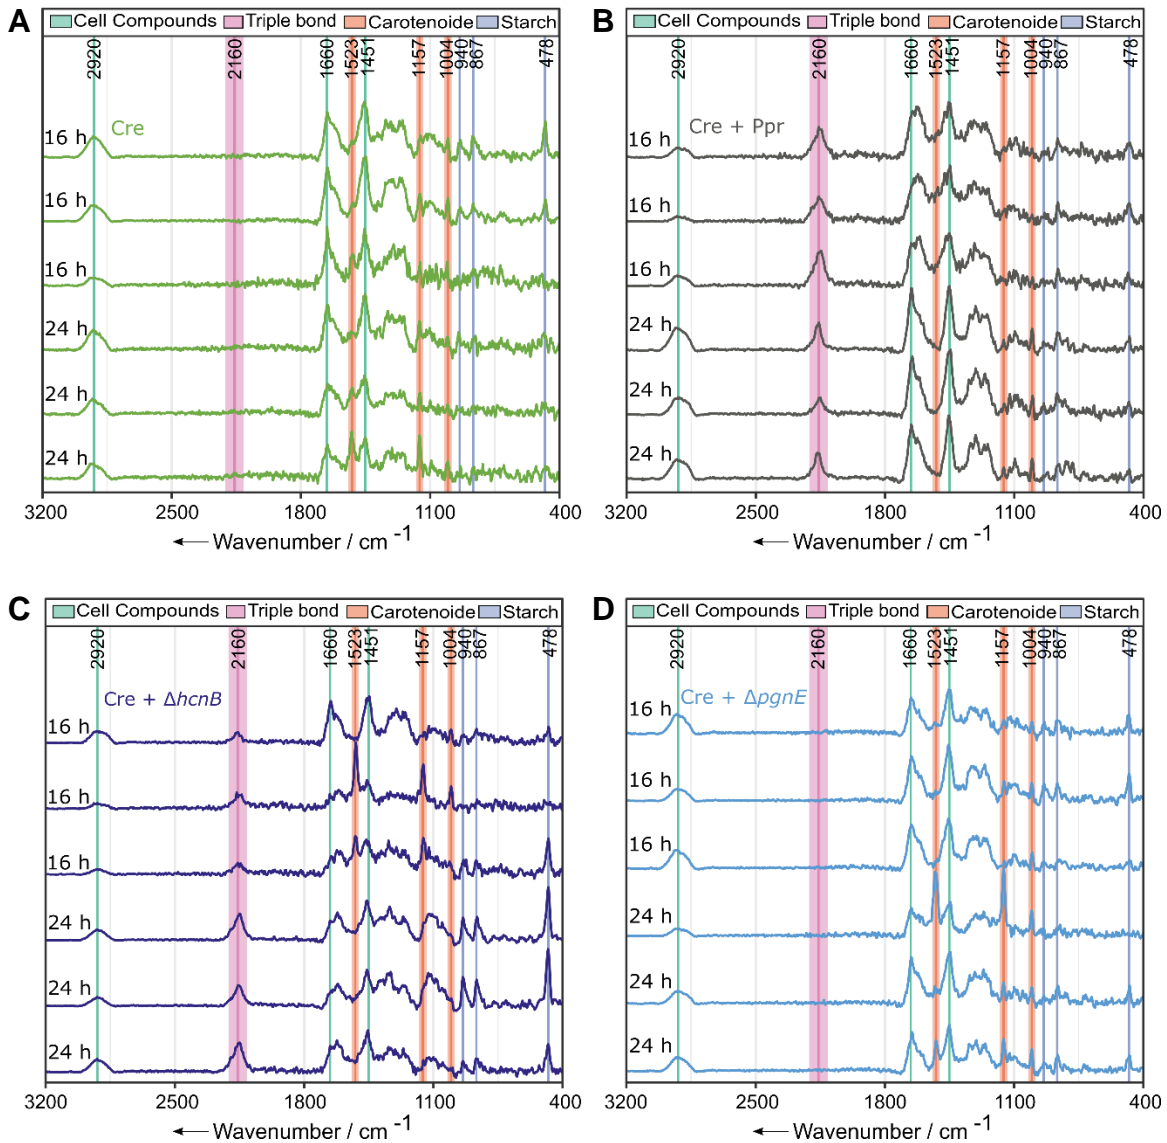

227  
 228  
 229  
 230  
 231  
 232  
 233

**Fig. S2.** Representative Raman spectra of *C. reinhardtii* cells grown in mono-culture (Cre, A) or in co-cultures of *C. reinhardtii* cells with *P. protegens* (Ppr) wild type (B) or its mutants  $\Delta hcnB$  (C) or  $\Delta pgnE$  (D) after 16 h and 24 h, respectively. For each timepoint and for each culture condition, three representative spectra are shown.

234

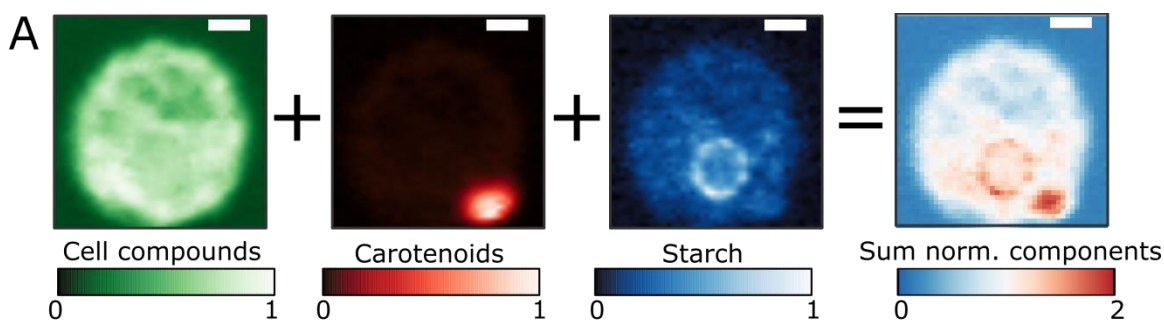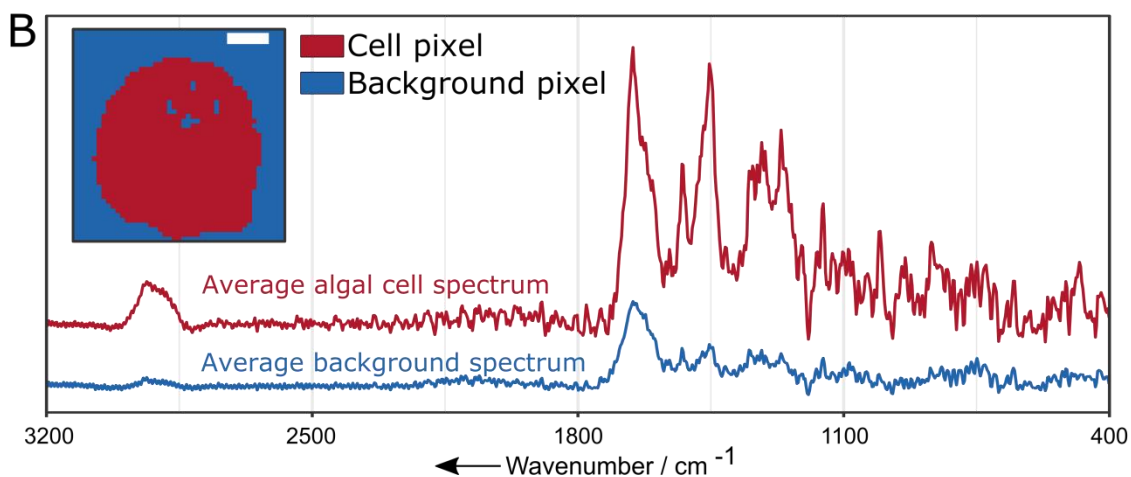

235

236

237 **Fig. S3.** Raman microspectroscopic image segmentation and calculation of background  
238 spectrum. A) Schematic representation of the workflow to compute an overall intensity map for all  
239 cell components by summing the normalized Raman intensity maps of the overall cell  
240 compounds, carotenoids, and starch. B) Average Raman algal cell (red) and background  
241 spectrum (blue) derived from the spectra corresponding to cell and background pixels (see inset  
242 for segmentation). Scale bars: 3  $\mu\text{m}$ . For details see Supplementary Information, section  
243 segmentation and background correction.

244

245

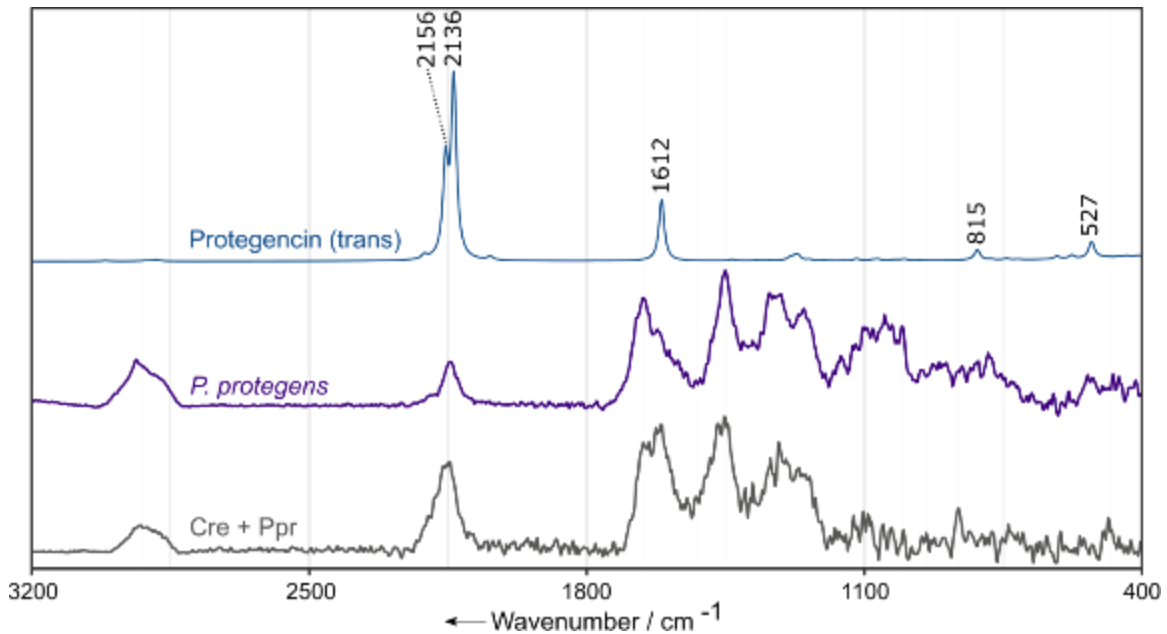

246  
247  
248

249 **Fig. S4.** Comparison of experimental and simulated Raman spectra. The grey spectrum depicts  
250 the average Raman spectrum of an exemplary *C. reinhardtii* cell co-cultivated with *P. protegens*  
251 after 16 h incubation time (Cre + Ppr). The purple graph depicts the Raman spectrum of axenic *P.*  
252 *protegens* bacteria after 24 h growth in TAP medium. The theoretical Raman spectrum shown in  
253 blue depicts the calculated Raman spectrum of protegencin in *trans*-form.

254

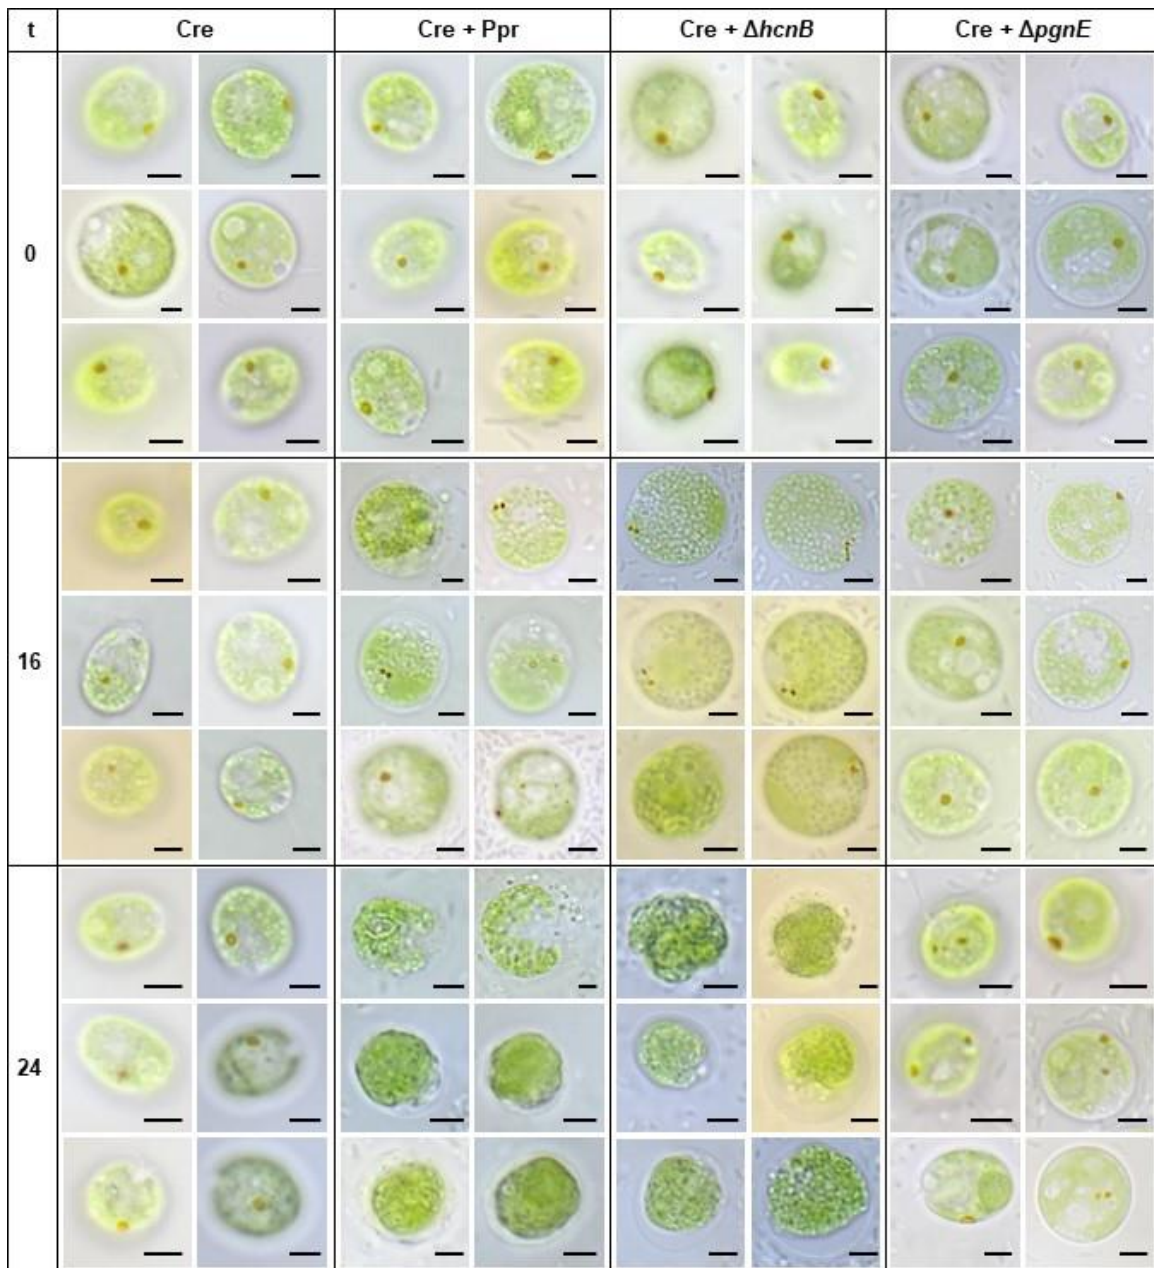

255

256

257

258

259

260

**Fig. S5.** Representative brightfield microscopy pictures of *C. reinhardtii* cells from mono-cultures (Cre) as well as in co-culture with *P. protegens* (Cre + Ppr) or its mutants (Cre +  $\Delta hcnB$  or Cre +  $\Delta pgnE$ ) after 0, 16 and 24 h of incubation. Scale bars: 3  $\mu$ m.

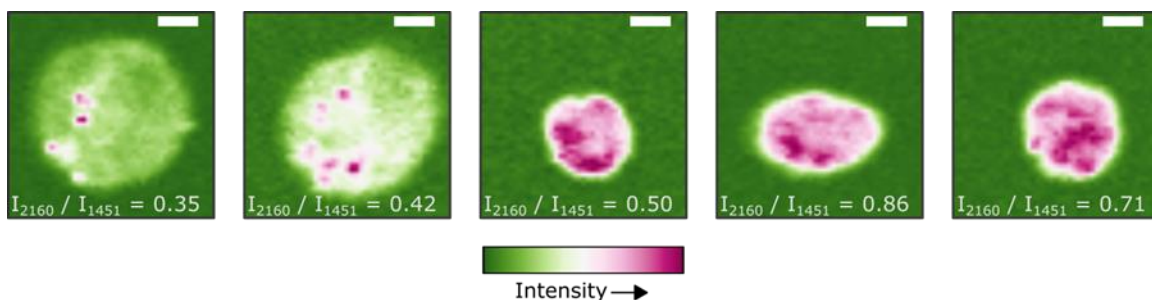

261

262

263

264

265

266

267

268

269

270

271

272

**Fig. S6.** Distribution of the triple bond substance in five exemplary cells of *C. reinhardtii* after co-culture with *P. protegens* for at least 16 h. Note: The shown Raman intensities depict the integrated intensities solely after the SNIP background correction to demonstrate that the embedding 0.5% agarose gel gives no contribution to the triple bond peak feature. The ratios  $I_{2160} / I_{1451}$  are the average Raman intensities associated with the triple bond compound ( $2,160 \text{ cm}^{-1}$ ) vs. a dominant band representing *C. reinhardtii* cellular material (C-H deformation mode at  $1,451 \text{ cm}^{-1}$ ) within the detected cell area (see “Evaluation of the protegencin content” for computational details in SI methods). The corresponding cell ratios for all investigated cells with varying co-culture conditions are visualized and summarized as box plots in Fig. 2B; Fig. 3G and Fig. S7B. Scale bars:  $3 \mu\text{m}$ .



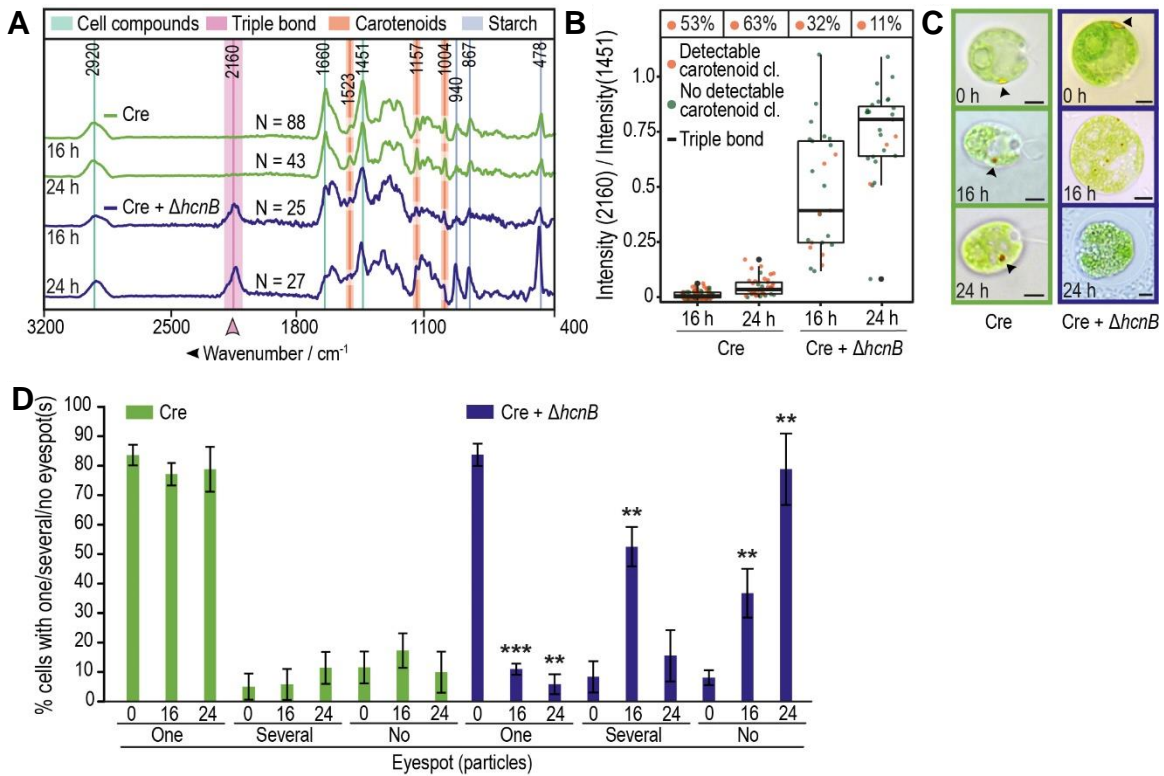

273

274

275 **Fig. S7.** Disappearance of eyespot carotenoids persists in the  $\Delta hcnB$  cyanide mutant. A, D)

276 Average Raman spectra of *C. reinhardtii* show a peak at 2160  $cm^{-1}$  and reduction of detectable

277 carotenoid peaks over time when co-cultured with *P. protegens* mutant  $\Delta hcnB$  (A, Cre +  $\Delta hcnB$ )

278 compared to axenic *C. reinhardtii* (A). Cultures were grown for 16 or 24 h in TAP. Spectra of algal

279 cells were generated by averaging over all pixels for the relevant Raman spectral class within the

280 cell body. N = total number of analyzed cells. All data were obtained from at least three

281 independent experiments. B) Summary of Raman spectroscopic measurements from A show the

282 presence of the triple bond compound TC (box plot) and a reduction of carotenoid clusters in co-

283 cultures (Cre +  $\Delta hcnB$ ). The data points plotted are for the ratio of average Raman intensities

284 associated with the TC (2,160  $cm^{-1}$ ) vs. a dominant band representing *C. reinhardtii* cellular

285 material (C-H deformation mode at 1,451  $cm^{-1}$ ). Each point represents a measurement of a single

286 alga; box plots indicate quartiles; % values above each box summarize the fraction of cells with

287 detected carotenoid cluster(s). C) Representative brightfield microscopic images of axenic *C.*

288 *reinhardtii* (green) and in co-culture (C, Cre +  $\Delta hcnB$ , blue) after 0, 16, or 24 h show the

289 disappearance of eyespots as visualized by their carotenoids (see arrowhead) over time in the

290 presence of bacteria. Scale bars: 3  $\mu m$ . Further cells are shown in Fig. S5. D) Fraction of algal

291 cells (from A–C) with visible eyespots as determined by brightfield microscopy. After 16 h in co-

292 culture, the eyespot is mostly disintegrated, and undetectable based on its color after 24 h,

293 whereas most cells in the axenic culture maintain one eyespot. Asterisks indicate significant

294 differences as calculated by the Kruskal-Wallis test with Dunn's post-hoc test (\*\*,  $P < 0.01$ ; and  
295 \*\*\*,  $P < 0.001$ ) in co-culture compared to axenic *C. reinhardtii* at the same time point. Error bars  
296 indicate standard deviations with  $N \geq 300$  cells per time point and culture.  
297



298  
299

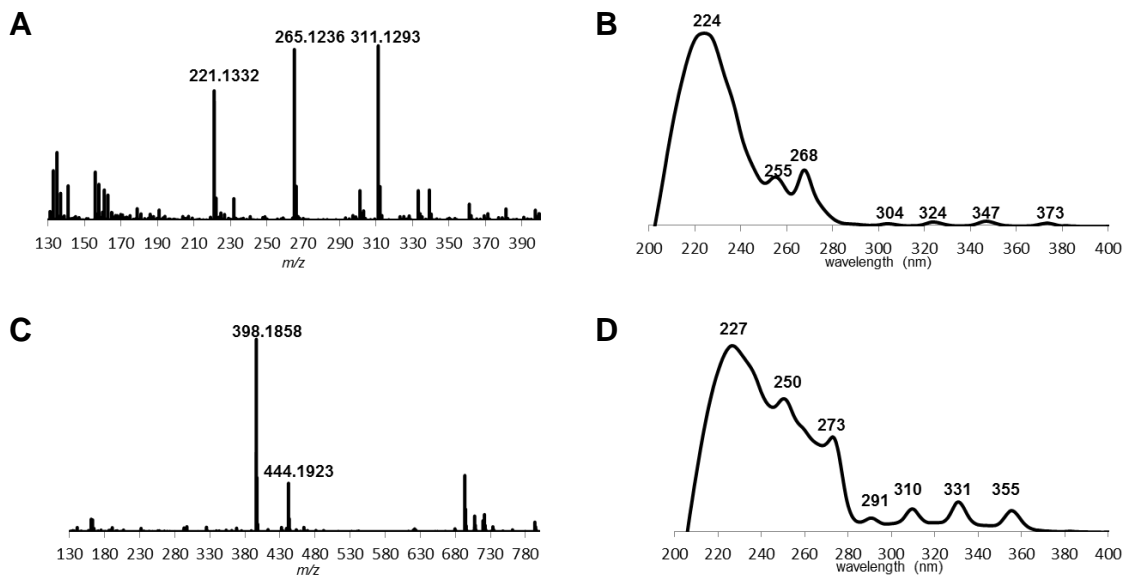

300  
301  
302  
303  
304  
305

**Fig. S8.** HRMS and UV spectra of protogenicin (A and B) ( $C_{18}H_{18}O_2$  [M-H] $^-$  calc. 265.1234, obs. 265.1236) and product of its click reaction with benzyl azide (C and D) ( $C_{25}H_{25}N_3O_2$  [M-H] $^-$  calc. 398.1874, obs. 398.1858). Experiments were repeated at least three times.

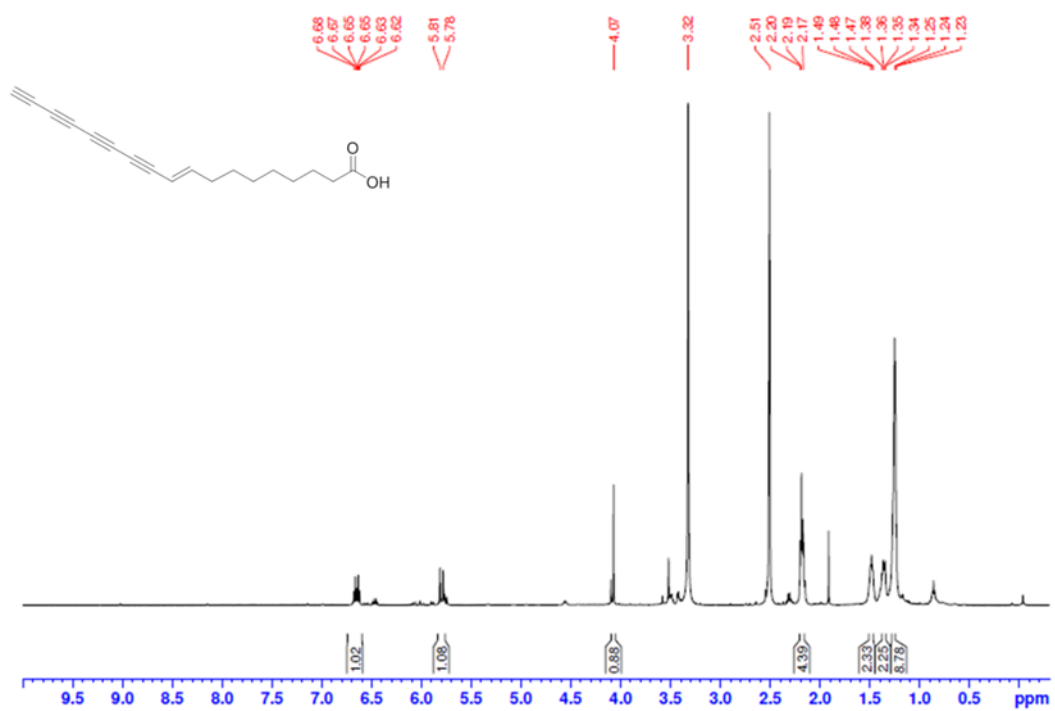

306

307 **Fig. S9.** <sup>1</sup>H NMR spectrum of protegencin. Experiments were repeated at least three times.

308

309

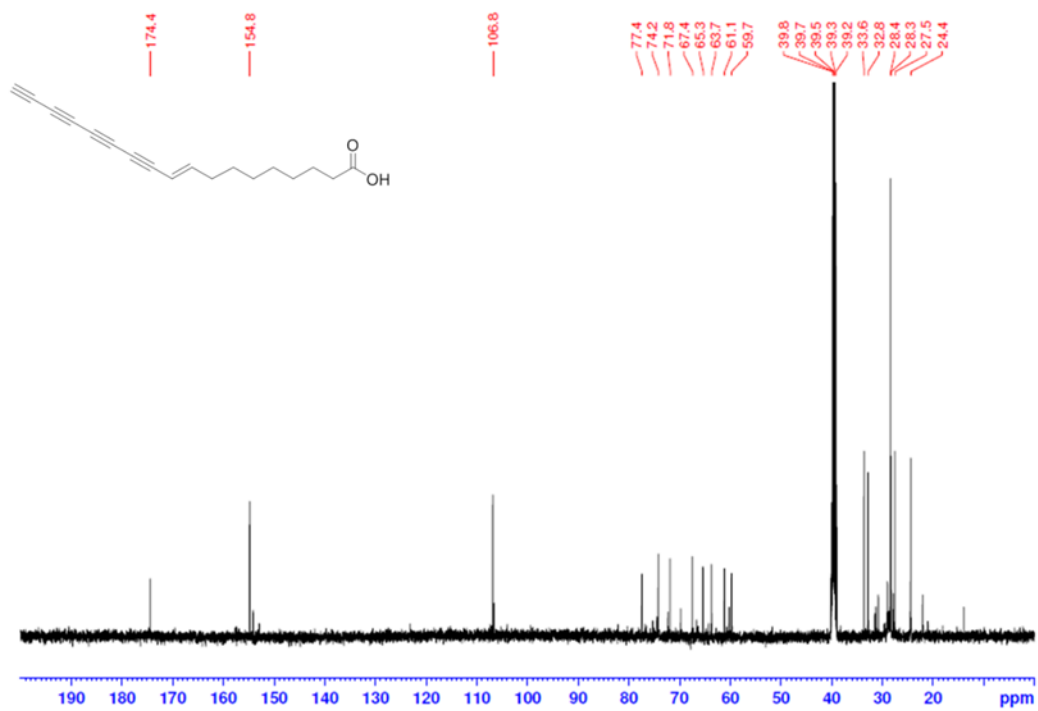

310

311 **Fig. S10.** <sup>13</sup>C NMR spectrum of protegenicin. Experiments were repeated at least three times.

312

313

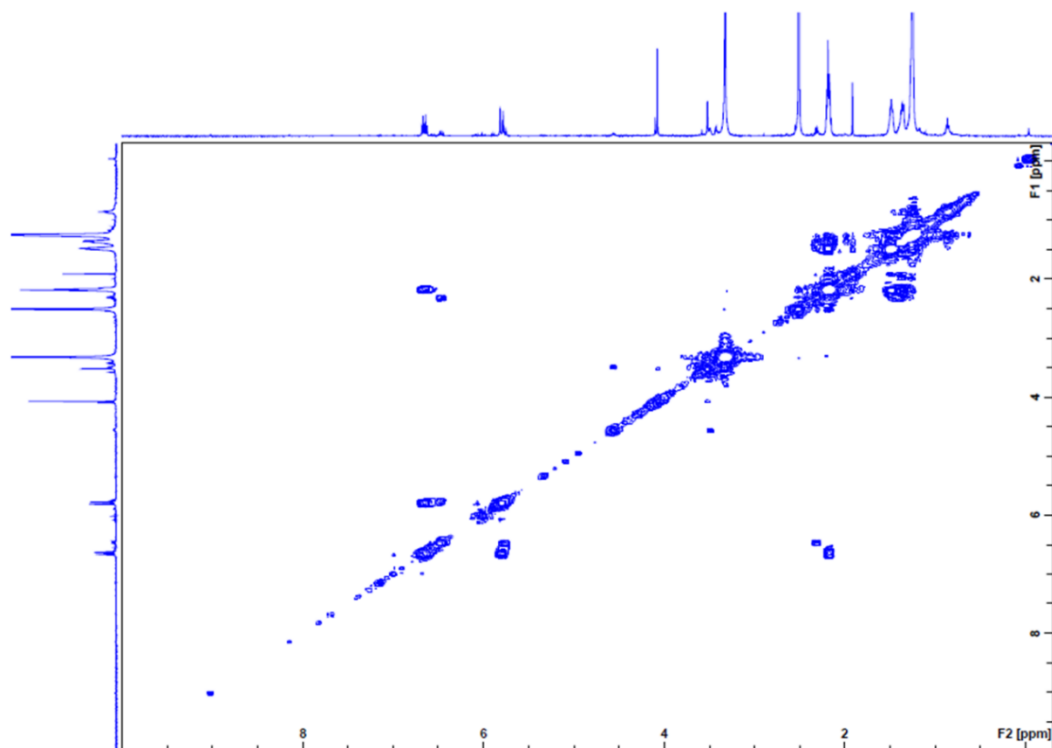

314  
315 **Fig. S11.** H,H-COSY NMR spectrum of protegenicin. Experiments were repeated at least three  
316 times.  
317  
318

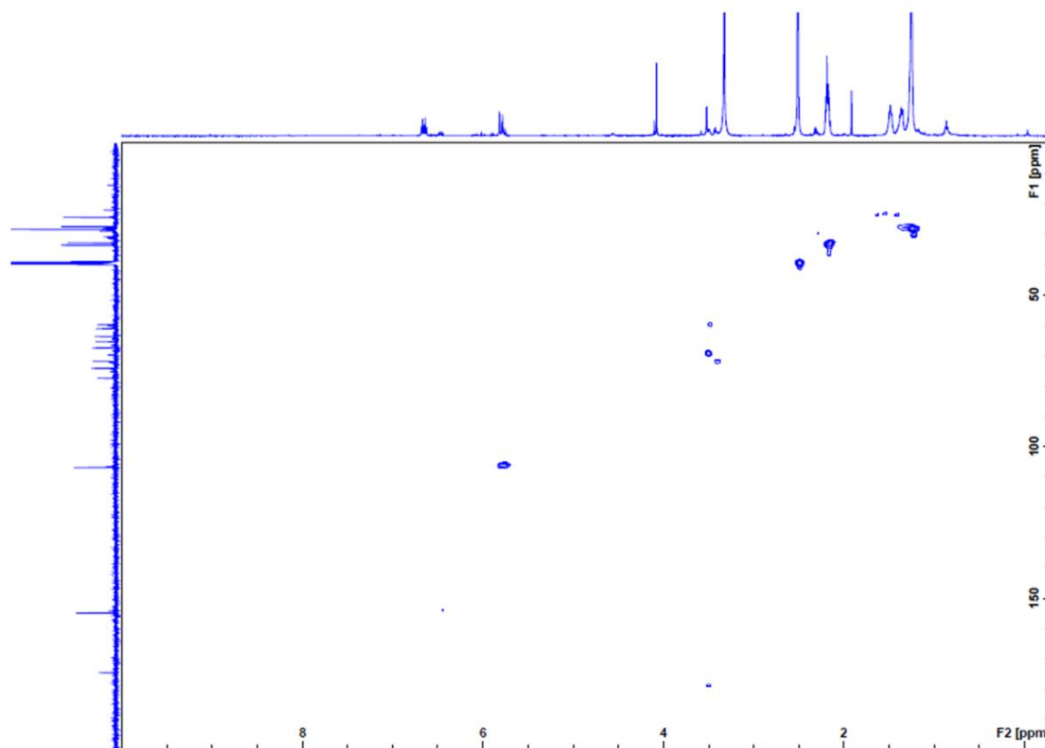

319

320 **Fig. S12.** HSQC NMR spectrum of protegencin. Experiments were repeated at least three times.

321

322

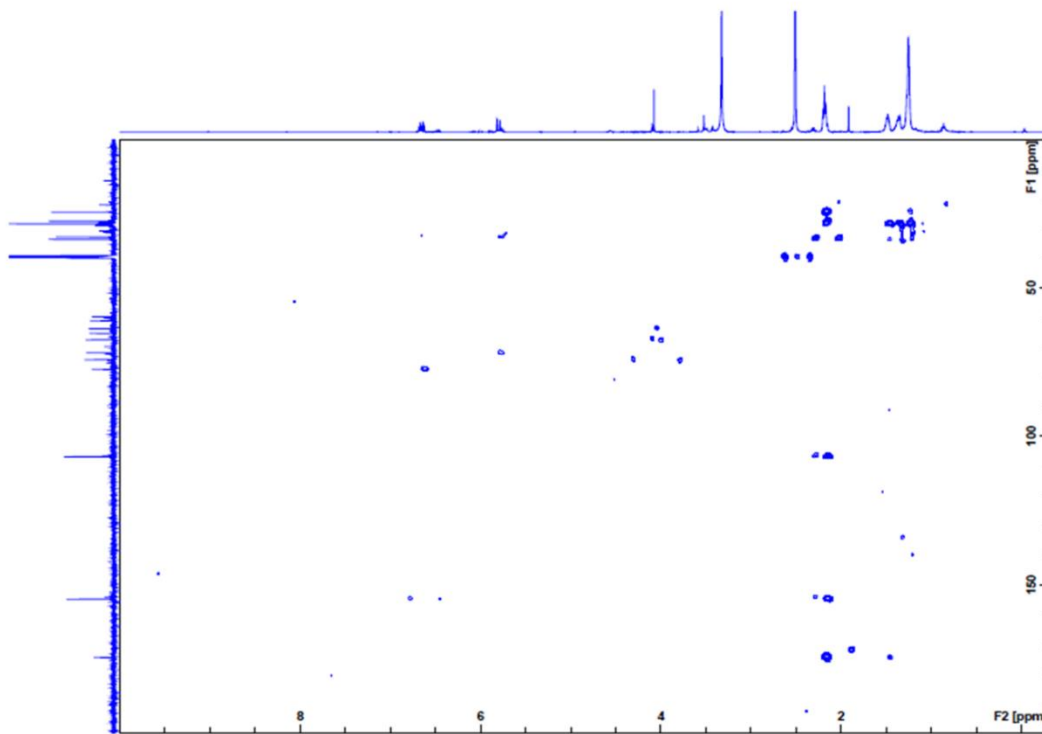

323

324 **Fig. S13.** HMBC NMR spectrum of protegencin. Experiments were repeated at least three times.

325

326

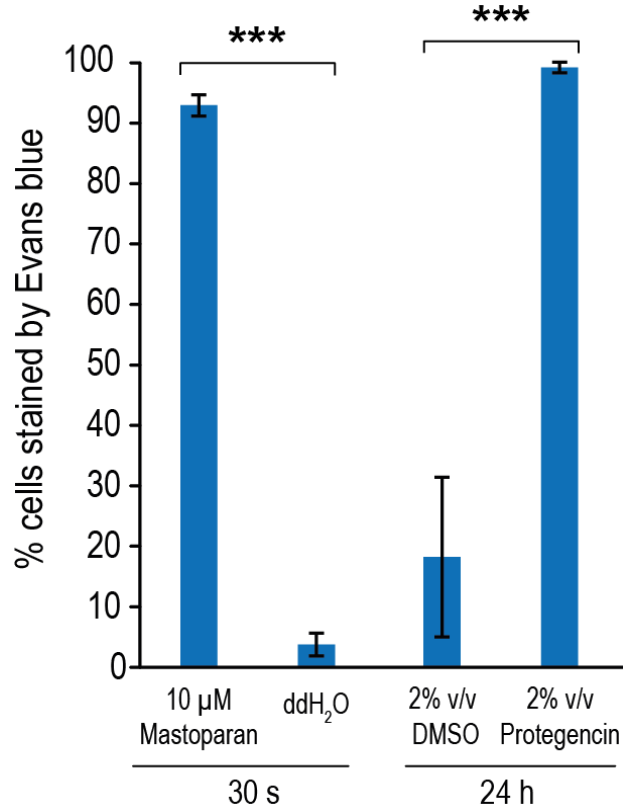

327  
 328  
 329  
 330  
 331  
 332  
 333  
 334  
 335  
 336  
 337  
 338  
 339

**Fig. S14.** Evans blue staining of *C. reinhardtii* wild-type strain CC-3348 with 10  $\mu$ M mastoparan and 2% (v/v) protegencin (equivalent to 10.4  $\mu$ M). Control treatments with ddH<sub>2</sub>O (solvent for mastoparan) (2) and 2% v/v DMSO (solvent for protegencin). Experiments were repeated at least three times independently with three technical replicates each. N  $\geq$  500 cells per technical replicate. Error bars indicate standard deviations and asterisks indicate significant differences, calculated by Student's t-test (\*\*\*, P < 0.001).

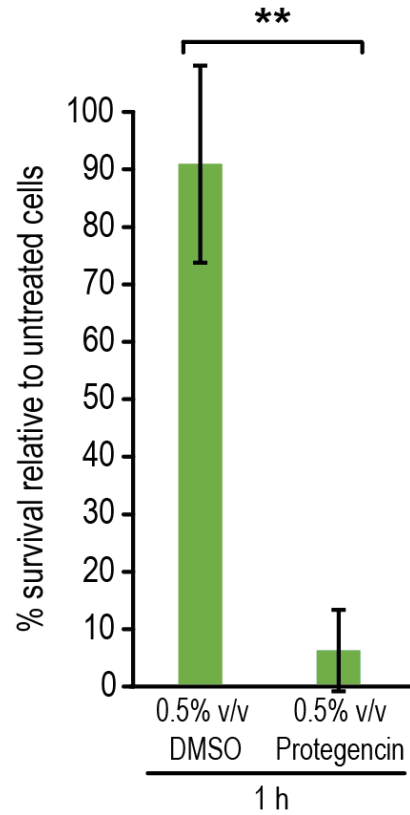

340

341

342 **Fig. S15.** Survival assay of *C. reinhardtii* wild-type strain CC-3348 after 1 h of incubation with  
343 0.5% v/v protegencin and DMSO (solvent for protegencin), respectively. Experiments were  
344 repeated at least three times independently with three technical replicates each. Error bars  
345 indicate standard deviations and asterisks indicate significant differences, calculated by Student's  
346 t-test (\*\*,  $P < 0.01$ ).

347



A

Light source

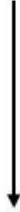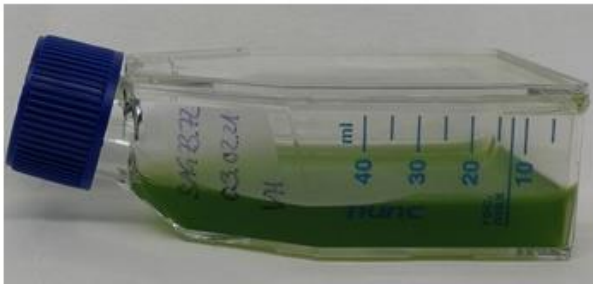

B

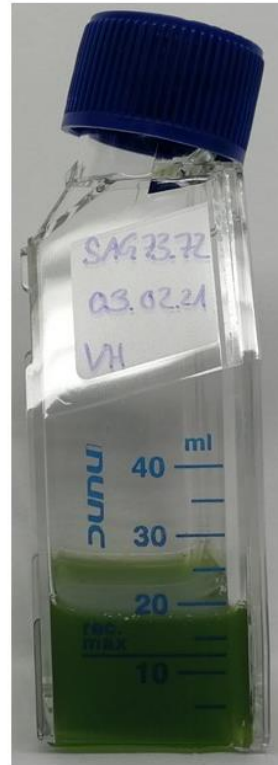

348  
349  
350  
351

352  
353

C

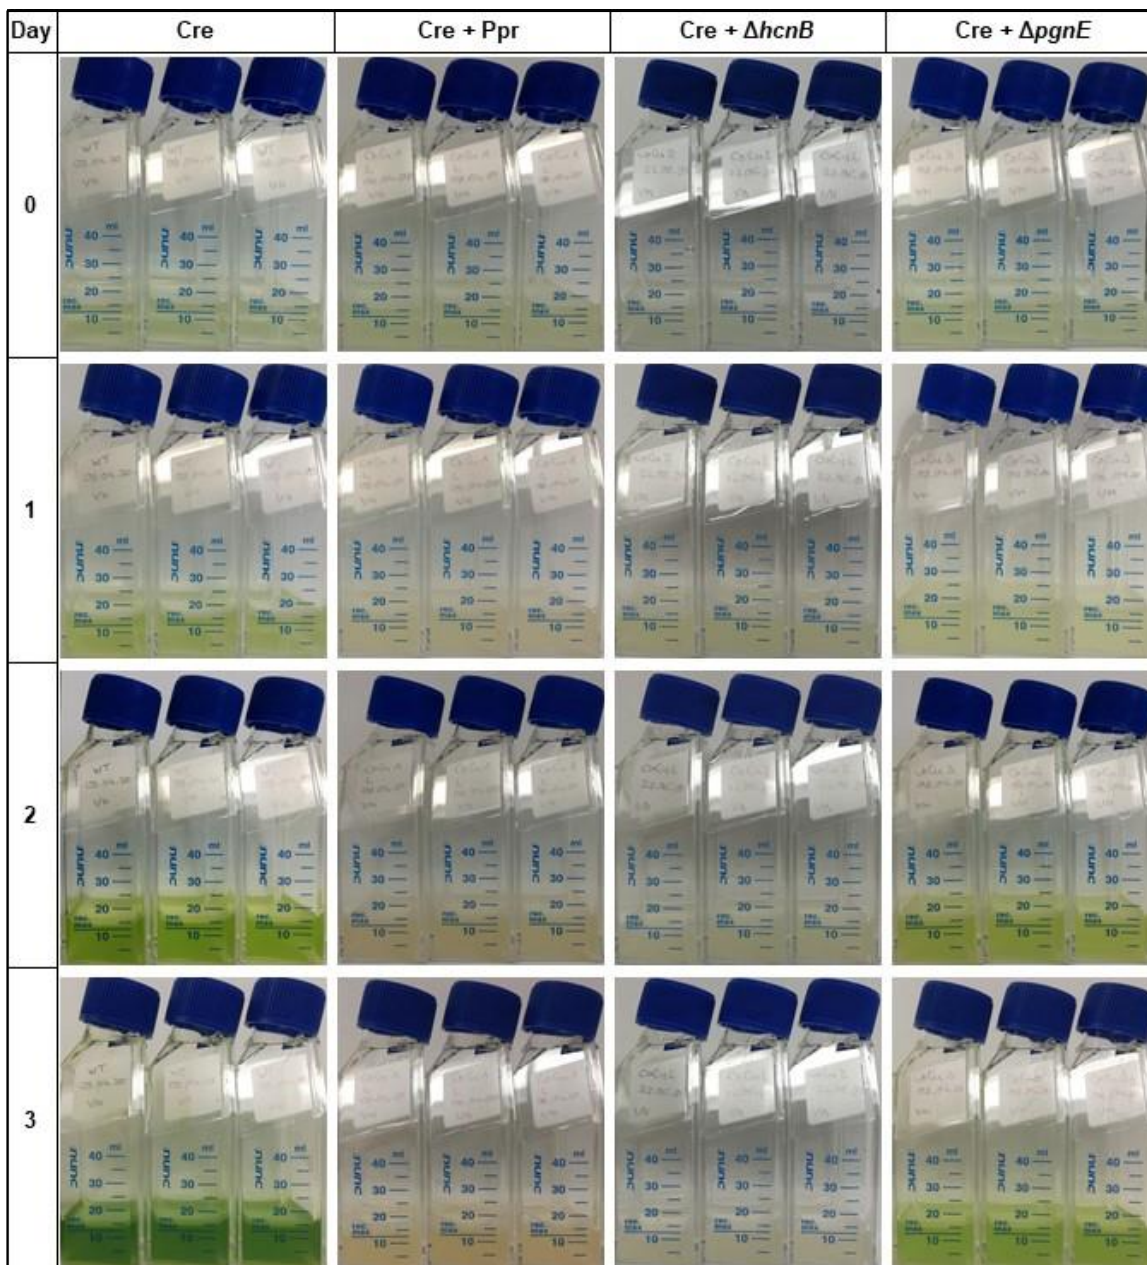

354  
355  
356

357  
358

C

- continued -

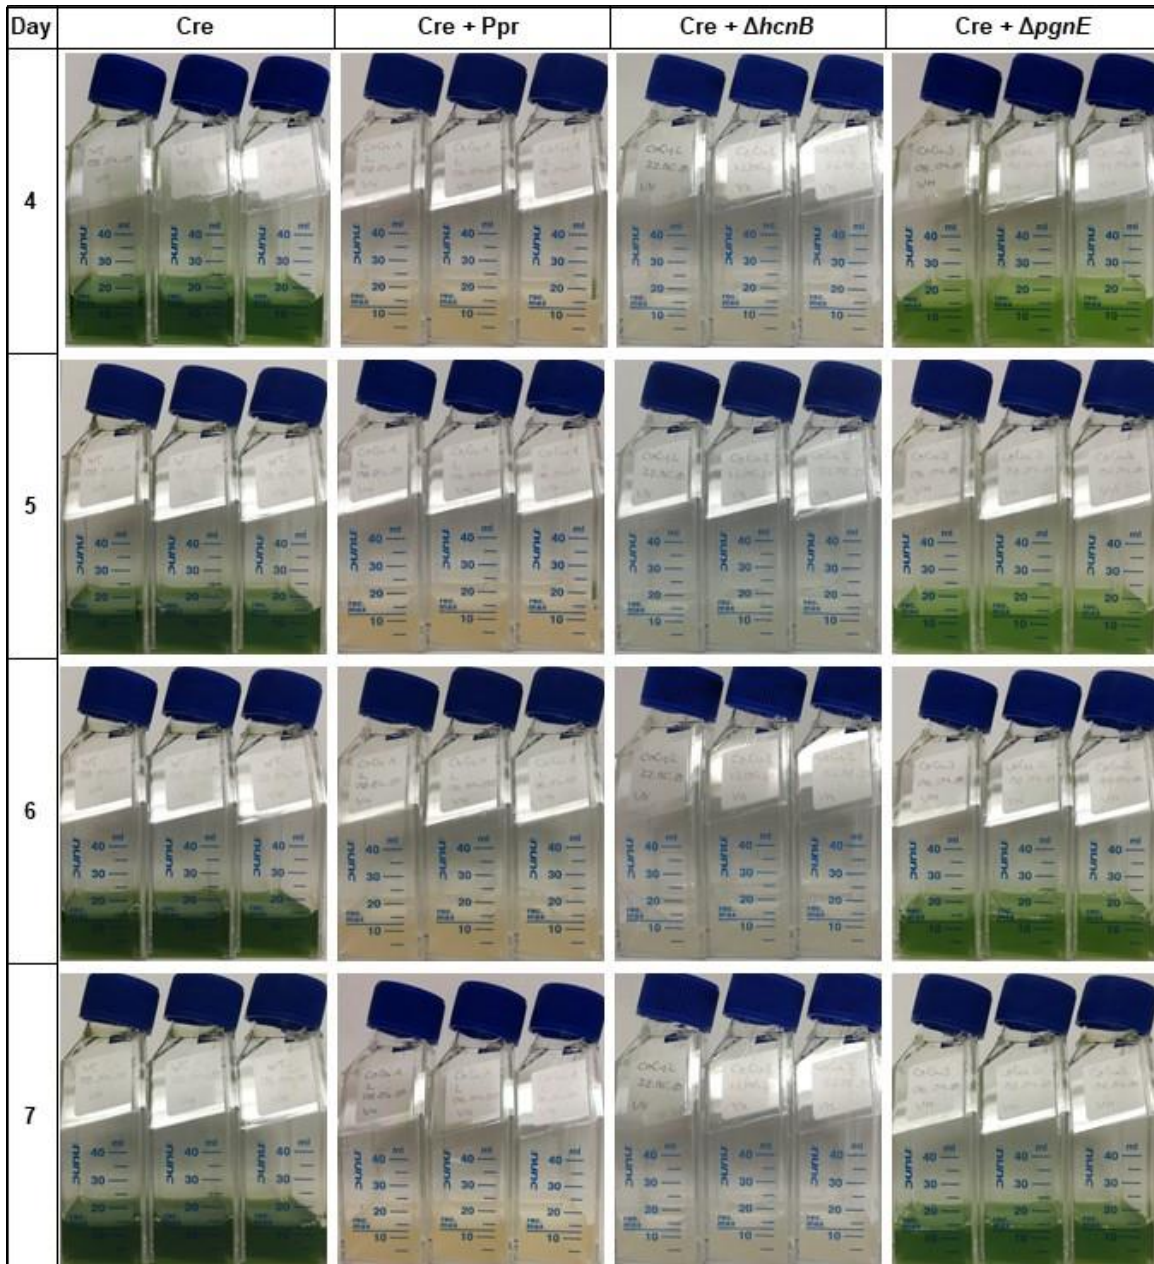

359  
360  
361  
362  
363  
364  
365  
366  
367

**Fig. S16.** Mono- and co-cultures of *C. reinhardtii* (Cre) with *P. protegens* (Cre + Ppr) or its mutants (Cre +  $\Delta hcnB$  or Cre +  $\Delta pgnE$ ). A) The used cell culture flask for algal growth (NUNC™ EasYFlask™, ThermoFisher Scientific, catalogue number 156367) is shown along with the position of the light source from above. Note that the flasks have a filter membrane in the cap to enable gas exchange. B) For daily photo-documentation, the flasks were put upright. C) Full flasks are shown as seen in a cropped version (only lower parts) in Fig. 4C.

368 **Table S1.** Assignment of the Raman bands of the components of interest with their  
 369 corresponding integration regions.

| Wavenumber / cm <sup>-1</sup> | Integration range / cm <sup>-1</sup> | Assignment                                                                                                                   | Reference |
|-------------------------------|--------------------------------------|------------------------------------------------------------------------------------------------------------------------------|-----------|
| 478                           | ±20                                  | <b>Starch</b> ; C–C–C deformation and C–O stretching                                                                         | (15)      |
| 867                           | ±20                                  | <b>Starch</b> ; C–C–H and C–O–C deformations                                                                                 | (15)      |
| 940                           | ±20                                  | <b>Starch</b> ; C–O–C and C–O–H deformations, C–O stretching                                                                 | (15)      |
| 1004                          | ±20                                  | <b>Carotenoid</b> ; C–CH <sub>3</sub> rocking                                                                                | (16)      |
| 1157                          | ±20                                  | <b>Carotenoid</b> ; C–C stretching                                                                                           | (16)      |
| 1451                          | ±30                                  | <b>Cell</b> ; Lipids/proteins: CH <sub>2</sub> and CH <sub>3</sub> deformation                                               | (17, 18)  |
| 1523                          | ±20                                  | <b>Carotenoid</b> ; C=C stretching                                                                                           | (16)      |
| 1660                          | ±50                                  | <b>Cell</b> ; Amide I: C=O stretching, Lipids: C=C stretch vibration                                                         |           |
| 2160                          | ±50                                  | C≡C stretching                                                                                                               | (19)      |
| 2920                          | ±50                                  | <b>Cell</b> ; Lipids/proteins: CH <sub>3</sub> symmetric and antisymmetric stretch, CH <sub>2</sub> antisymmetric stretching | (17)      |

370

371

372 **Table S2.**  $^1\text{H}$  (500 MHz) and  $^{13}\text{C}$  (125 MHz) NMR data for protegencin (in  $\text{DMSO-}d_6$ ).

373

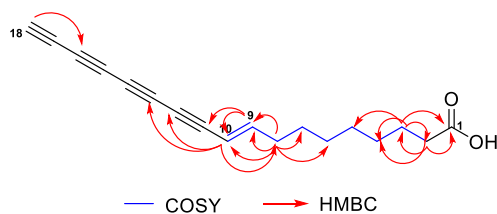

374

| No. | $\delta_{\text{C}}$ , type | $\delta_{\text{H}}$ , multiplet, $J$ (in Hz) |
|-----|----------------------------|----------------------------------------------|
| 1   | 174.4, COOH                | 11.95, br                                    |
| 2   | 33.6, $\text{CH}_2$        | 2.19, t (7.4)                                |
| 3   | 24.4, $\text{CH}_2$        | 1.48, m                                      |
| 4   | 28.4, $\text{CH}_2$        | 1.25, m                                      |
| 5   | 28.4, $\text{CH}_2$        | 1.25, m                                      |
| 6   | 28.4, $\text{CH}_2$        | 1.25, m                                      |
| 7   | 27.5, $\text{CH}_2$        | 1.36, m                                      |
| 8   | 32.8, $\text{CH}_2$        | 2.19, m                                      |
| 9   | 154.8, CH                  | 6.65, dt (16.0, 7.1)                         |
| 10  | 106.8, CH                  | 5.79, d (16.0)                               |
| 11  | 77.4, C                    |                                              |
| 12  | 71.8, C                    |                                              |
| 13  | 59.7–67.4, C               |                                              |
| 14  | 59.7–67.4, C               |                                              |
| 15  | 59.7–67.4, C               |                                              |
| 16  | 59.7–67.4, C               |                                              |
| 17  | 63.7, C                    |                                              |
| 18  | 74.2, CH                   | 4.07, s                                      |

375  
376

377 **Table S3.** Primers for mutation strains of *P. protegens* Pf-5.

| <b>Gene</b>              | <b>Forward primer</b>                                    | <b>Reverse primer</b>                                       |
|--------------------------|----------------------------------------------------------|-------------------------------------------------------------|
| <i>pgnE</i><br><i>F1</i> | 5'- TGGCTGACGGTCGCAACTCCGG -3'                           | 5'-<br>GCTACTTAATTAAGCTAGCGTAGCCCCTGGAT<br>ATTGCCGATAAA -3' |
| <i>pgnE</i><br><i>F2</i> | 5'-<br>GCTACGCTAGCTTAATTAAGTAGCATAACCCGC<br>AGCTGGGAG-3' | 5'- GTCGGGCCGGGCCGTTTGACAT -3'                              |
| <i>Apr<sup>R</sup></i>   | 5'-GCTACGCTAGCATTCCGGGGATCCGTCGACC-<br>3'                | 5'-<br>GCTACTTAATTAATGTAGGCTGGAGCTGCTTC-<br>3'              |

378  
379  
380

381 **SI Note**

382 While our manuscript was under review, an article reporting an identical polyynes compound  
383 (named protegenin A) from *P. protegens* Cab57 was published online May 21, 2021 (received:  
384 April 12 2021) (20). In the preceding BioRxiv preprints of our work (B) and of an independent  
385 study (A) by Mullins et al. (21), the polyynes from *P. protegens* Pf-5 has been named protegencin.

386 (A) <https://www.biorxiv.org/content/10.1101/2021.03.05.433886v1> (Posted March 6, 2021)

387 (B) <https://www.biorxiv.org/content/10.1101/2021.03.24.436739v1> (Posted March 24, 2021)

388 Therefore, we decided to keep the name protegencin in the current manuscript.

389



390 **SI References**

391

- 392 1. C. Ross, K. Scherlach, F. Kloss, C. Hertweck, The molecular basis of conjugated polyene  
393 biosynthesis in phytopathogenic bacteria. *Angew. Chem. Int. Ed.* **53**, 7794-7798 (2014).
- 394 2. Z. P. Yordanova, E. J. Woltering, V. M. Kapchina-Toteva, E. T. Iakimova, Mastoparan-  
395 induced programmed cell death in the unicellular alga *Chlamydomonas reinhardtii*. *AoB*  
396 *Plants* **111**, 191-205 (2012).
- 397 3. C. Ding, X. He (2004) K-means clustering via principal component analysis. in  
398 *Proceedings of the twenty-first international conference on Machine learning* (Association  
399 for Computing Machinery, Banff, Alberta, Canada), p 29.
- 400 4. F. Neese, The ORCA program system. *Wiley Interdiscip. Rev. Comput. Mol. Sci.* **2**, 73-78  
401 (2012).
- 402 5. F. Neese, Software update: the ORCA program system, version 4.0. *Wiley Interdiscip.*  
403 *Rev. Comput. Mol. Sci.* **8**, e1327 (2018).
- 404 6. A. D. Becke, Density-functional thermochemistry. III. The role of exact exchange. *J.*  
405 *Chem. Phys.* **98**, 5648-5652 (1993).
- 406 7. C. Lee, W. Yang, R. G. Parr, Development of the Colle-Salvetti correlation-energy  
407 formula into a functional of the electron density. *Phys. Rev. B* **37**, 785-789 (1988).
- 408 8. F. Weigend, R. Ahlrichs, Balanced basis sets of split valence, triple zeta valence and  
409 quadruple zeta valence quality for H to Rn: Design and assessment of accuracy. *Phys.*  
410 *Chem. Chem. Phys.* **7**, 3297-3305 (2005).
- 411 9. S. Grimme, J. Antony, S. Ehrlich, H. Krieg, A consistent and accurate ab initio  
412 parametrization of density functional dispersion correction (DFT-D) for the 94 elements  
413 H-Pu. *J. Chem. Phys.* **132**, 154104 (2010).
- 414 10. S. Grimme, S. Ehrlich, L. Goerigk, Effect of the damping function in dispersion corrected  
415 density functional theory. *J. Comput. Chem.* **32**, 1456-1465 (2011).
- 416 11. K. Eichkorn, O. Treutler, H. Öhm, M. Häser, R. Ahlrichs, Auxiliary basis sets to  
417 approximate Coulomb potentials. *Chem. Phys. Lett.* **240**, 283-290 (1995).
- 418 12. F. Weigend, Accurate Coulomb-fitting basis sets for H to Rn. *Phys. Chem. Chem. Phys.*  
419 **8**, 1057-1065 (2006).
- 420 13. P. L. Polavarapu, Ab initio vibrational Raman and Raman optical activity spectra. *J. Phys.*  
421 *Chem.* **94**, 8106-8112 (1990).
- 422 14. NIST Computational Chemistry Comparison and Benchmark Database, NIST Standard  
423 Reference Database Number 101, Released 20.08.2019, Russell D. Johnson III (Ed.),  
424 <http://cccbdb.nist.gov/>. Accessed 27 October 2020.
- 425 15. Y. Ji *et al.*, Raman spectroscopy provides a rapid, non-invasive method for quantitation of  
426 starch in live, unicellular microalgae. *Biotechnology Journal* **9**, 1512-1518 (2014).



- 427 16. V. E. de Oliveira, H. V. Castro, H. G. Edwards, L. F. C. de Oliveira, Carotenes and  
428 carotenoids in natural biological samples: a Raman spectroscopic analysis. *J. Raman*  
429 *Spec.* **41**, 642-650 (2010).
- 430 17. C. Krafft, T. Knetschke, R. H. Funk, R. Salzer, Identification of organelles and vesicles in  
431 single cells by Raman microspectroscopic mapping. *Vib. Spec.* **38**, 85-93 (2005).
- 432 18. J. De Gelder, K. De Gussem, P. Vandenabeele, L. Moens, Reference database of  
433 Raman spectra of biological molecules. *J. Raman Spec.* **38**, 1133-1147 (2007).
- 434 19. L. Wei *et al.*, Live-cell bioorthogonal chemical imaging: stimulated Raman scattering  
435 microscopy of vibrational probes. *Acc. Chem. Res.* **49**, 1494-1502 (2016).
- 436 20. K. Murata, M. Suenaga, K. Kai, Genome mining discovery of protegenins A–D, bacterial  
437 polyynes involved in the antioomycete and biocontrol activities of *Pseudomonas*  
438 *protegens*. *ACS Chem. Biol.*, <https://doi.org/10.1021/acscchembio.1c00276>  
439 (2021).
- 440 21. Mullins, A. J. *et al.*, Exploration of polyyne biosynthetic gene cluster diversity in bacteria  
441 leads to the discovery of the *Pseudomonas* polyyne protegencin. bioRxiv [Preprint]  
442 (2021). <https://www.biorxiv.org/content/10.1101/2021.03.05.433886v1> (accessed 17 April  
443 2021).
- 444  
445  
446
